# Supplementary material for: Rethinking the Meaning of Cloud Computing for Health Care: A Taxonomic Perspective and Future Research Directions
Source: PubMed Central journal article supplement (PMC6060303; doi:10.2196/10041), 2018-07-11
Supplement: jmir_v20i7e10041_app2.pdf [file jmir_v20i7e10041_app2.pdf]

## Multimedia Appendix 2: Overview of Interview Questions

| #  | Question                                                                                                                                                                      | Purpose                                                                                                             |
|----|-------------------------------------------------------------------------------------------------------------------------------------------------------------------------------|---------------------------------------------------------------------------------------------------------------------|
| 1  | Where do you work? Please describe your working position and your scope of duties or your working activities in your organization.                                            | To identify interviewee's scope of duties and thus validate her eligibility for the interview                       |
| 2  | How many years of work experience do you have in your line of work?                                                                                                           | To determine interviewee's professional experience                                                                  |
| 3  | How many employees do you have in your organization?                                                                                                                          | To obtain information about the organization size                                                                   |
| 4  | What do you understand about cloud computing in health care organizations?                                                                                                    | To verify expert's qualifications and obtain data about the concept of cloud computing in health care organizations |
| 5  | What do cloud computing mean to health care organizations?                                                                                                                    | To verify expert's qualifications and obtain data about the concept of cloud computing in health care organizations |
| 6  | Is your hospital/clinic currently using any cloud computing services? Is your organization providing any cloud services for hospitals/clinics? What are these cloud services? | To address concrete cloud services for health care organizations, in which the interviewee is involved              |
| 7  | Do you know of any other cloud computing services being used by hospitals or clinics that you are familiar with? What are these cloud computing services?                     | To address further cloud services for health care organizations that the interviewee is familiar with               |
| 8  | For each of the cloud computing services you mentioned, what concrete services does it provide?                                                                               | To identify the purpose of each concrete cloud computing service                                                    |
| 9  | For each of the cloud computing services you mentioned, please describe how it works and supports hospitals.                                                                  | To address the basic functions of each concrete cloud computing service                                             |
| 10 | For each of the cloud computing services you mentioned, what concrete features or characteristics does it possess?                                                            | To address the features of each concrete cloud computing service                                                    |
| 11 | For each of the cloud computing services, is there any further information about it? Do you have any further comments?                                                        | To address further possibly useful information about each cloud computing service                                   |
