# Supplementary material for: Rethinking the Meaning of Cloud Computing for Health Care: A Taxonomic Perspective and Future Research Directions
Source: PubMed Central journal article supplement (PMC6060303; doi:10.2196/10041), 2018-07-11
Supplement: jmir_v20i7e10041_app4.pdf [file jmir_v20i7e10041_app4.pdf]

**Multimedia Appendix 4: Taxonomy of Cloud Computing Services (CCSs) for Health Care Organizations**

| CCSa | ST |    |    |    | SF |    |    | DM |    |    | TCA |    |    |    |    |    | T  |    | U  |     |   | SDD |    |    | PDI |    |    |    |
|------|----|----|----|----|----|----|----|----|----|----|-----|----|----|----|----|----|----|----|----|-----|---|-----|----|----|-----|----|----|----|
|      | cl | ad | sg | re | sw | pf | if | pb | pr | co | sc  | el | ub | ce | sh | io | se | rt | nr | pan | s | fm  | ip | at | sp  | in | ex | ni |
| C01  | √  |    |    |    | √  |    |    | √  |    |    | √   |    |    |    |    | √  |    |    | √  |     | √ |     |    |    | √   |    |    |    |
| C02  | √  | √  |    |    | √  |    |    | √  |    |    | √   |    | √  |    |    |    |    |    | √  |     | √ |     |    |    |     | √  |    |    |
| C03  | √  |    |    |    | √  |    |    | √  |    |    | √   |    |    |    | √  | √  |    |    | √  |     | √ |     |    |    |     | √  |    |    |
| C04  |    | √  |    |    | √  |    |    | √  |    |    |     |    | √  |    | √  |    |    |    | √  |     | √ |     |    | √  |     | √  |    |    |
| C05  | √  |    |    |    | √  |    |    | √  |    |    | √   |    | √  |    |    |    |    | √  |    | √   | √ |     |    |    | √   |    | √  |    |
| C06  | √  |    |    |    |    | √  |    |    | √  |    | √   |    |    | √  |    |    | √  |    | √  |     | √ |     | √  |    |     | √  |    |    |
| C07  | √  |    |    |    | √  |    |    | √  |    |    | √   |    | √  |    | √  |    |    | √  |    | √   | √ |     |    | √  |     | √  |    |    |
| C08  | √  |    | √  |    | √  |    |    | √  |    |    |     |    | √  |    | √  |    | √  | √  |    | √   |   |     | √  |    |     | √  |    |    |
| C09  | √  |    |    |    | √  |    |    |    | √  |    |     |    |    |    |    | √  |    |    | √  |     | √ |     | √  |    | √   |    |    |    |
| C10  | √  |    |    |    | √  |    |    |    | √  |    |     |    | √  |    | √  |    |    | √  |    | √   | √ |     |    |    | √   |    | √  |    |
| C11  | √  |    |    |    | √  |    |    | √  |    |    | √   |    |    | √  |    |    |    | √  |    | √   |   | √   |    |    | √   |    |    |    |
| C12  | √  |    |    |    | √  |    |    |    | √  |    | √   |    |    |    | √  |    |    | √  |    | √   |   | √   |    |    | √   |    |    |    |
| C13  | √  |    |    |    | √  |    |    |    | √  |    |     |    | √  |    | √  |    |    | √  |    | √   |   |     |    | √  | √   |    |    |    |
| C14  | √  |    |    |    | √  |    |    | √  |    |    | √   |    |    | √  |    |    |    | √  |    | √   |   | √   |    |    | √   |    |    |    |
| C15  | √  |    |    | √  | √  |    |    | √  |    |    | √   |    | √  |    |    | √  |    | √  |    | √   |   | √   |    |    |     | √  |    |    |
| C16  | √  |    |    |    | √  |    |    | √  |    |    | √   |    | √  |    |    |    |    | √  |    | √   | √ |     |    |    | √   |    | √  |    |
| C17  | √  |    |    |    | √  |    |    | √  |    |    | √   |    |    |    | √  |    |    | √  |    | √   |   |     |    | √  | √   |    |    |    |
| C18  | √  |    |    |    | √  |    |    |    | √  |    | √   |    | √  |    | √  |    |    | √  |    | √   |   |     | √  |    | √   |    |    |    |
| C19  |    | √  |    |    | √  |    |    |    | √  |    | √   |    |    |    |    | √  |    |    | √  |     | √ |     |    |    |     | √  |    |    |
| C20  | √  |    |    |    | √  |    |    | √  |    |    |     |    | √  |    | √  |    | √  | √  |    | √   |   | √   |    |    | √   |    |    |    |
| C21  | √  |    |    |    | √  |    |    | √  |    |    |     |    | √  |    | √  |    | √  | √  |    | √   |   | √   |    |    | √   |    |    |    |
| C22  |    | √  | √  |    | √  |    |    | √  |    |    | √   |    |    |    |    |    |    | √  |    | √   |   | √   |    |    | √   |    |    |    |
| C23  | √  |    |    |    | √  |    |    |    |    | √  | √   |    |    |    | √  |    |    | √  |    | √   |   | √   |    |    | √   |    |    |    |
| C24  | √  | √  | √  | √  | √  |    |    |    | √  |    |     | √  | √  | √  |    |    |    | √  |    | √   |   | √   |    |    | √   |    |    |    |
| C25  | √  |    |    |    | √  |    |    |    | √  | √  |     |    |    |    | √  |    | √  |    | √  |     | √ |     | √  |    | √   |    |    |    |
| C26  | √  | √  |    |    | √  |    |    |    | √  |    |     |    | √  |    |    |    |    | √  |    | √   | √ |     |    |    | √   |    | √  |    |
| C27  | √  |    |    |    | √  |    |    |    | √  |    |     |    | √  |    | √  |    |    | √  |    | √   |   |     |    | √  | √   |    |    |    |
| C28  |    | √  |    |    |    |    | √  |    | √  |    |     | √  |    |    |    |    |    | √  |    | √   |   | √   |    |    | √   |    |    |    |
| C29  |    | √  |    |    | √  |    |    |    | √  |    |     |    | √  |    |    |    |    | √  |    | √   | √ |     |    |    | √   |    | √  |    |
| C30  | √  |    |    |    | √  |    |    |    | √  |    |     |    | √  |    | √  |    |    | √  |    | √   |   |     |    | √  | √   |    |    |    |
| C31  | √  |    |    |    | √  |    |    | √  |    |    | √   |    |    | √  |    |    |    | √  |    | √   |   | √   |    |    | √   |    |    |    |
| C32  |    | √  |    |    | √  |    |    | √  | √  |    | √   |    |    |    |    |    |    | √  |    | √   |   | √   |    |    | √   |    |    |    |
| C33  | √  |    |    |    | √  |    |    |    |    | √  | √   |    |    |    | √  |    | √  |    | √  |     | √ |     | √  |    |     | √  |    |    |
| C34  | √  |    |    |    | √  |    |    | √  |    |    | √   |    | √  |    |    |    |    | √  |    | √   | √ |     |    |    | √   |    | √  |    |
| C35  | √  | √  | √  | √  | √  |    |    | √  |    |    | √   |    |    | √  |    |    |    | √  |    | √   |   | √   |    |    | √   |    |    |    |
| C36  | √  | √  | √  | √  | √  |    |    |    | √  |    |     | √  | √  | √  |    |    |    | √  |    | √   |   | √   |    |    | √   |    |    |    |
| C37  | √  | √  | √  | √  |    |    | √  |    |    | √  | √   |    | √  |    |    |    |    | √  |    | √   |   | √   |    |    | √   |    |    |    |
| C38  | √  |    |    |    |    |    | √  |    | √  |    | √   |    |    |    |    |    | √  | √  |    | √   |   | √   |    |    | √   |    |    |    |
| C39  |    |    | √  |    | √  |    |    | √  |    |    | √   |    |    |    |    |    |    | √  |    | √   |   | √   |    |    | √   |    |    |    |

## Multimedia Appendix 4: Continued

| CCS <sup>a</sup> | ST |    |    |    | SF |    |    | DM |    |    | TCA |    |    |    |    |    | T  |    | U  |    |    | SDD |    |    | PDI |    |    |    |
|------------------|----|----|----|----|----|----|----|----|----|----|-----|----|----|----|----|----|----|----|----|----|----|-----|----|----|-----|----|----|----|
|                  | cl | ad | sg | re | sw | pf | if | pb | pr | co | sc  | el | ub | ce | sh | io | se | rt | nr | pa | ns | fm  | ip | at | sp  | in | ex | ni |
| C40              | √  |    |    |    | √  |    |    |    |    | √  |     |    |    |    | √  |    |    | √  |    |    | √  |     |    |    |     | √  |    |    |
| C41              |    |    |    | √  | √  |    |    | √  |    |    | √   |    |    |    |    | √  | √  | √  |    |    | √  |     |    |    |     | √  |    |    |
| C42              |    | √  |    |    | √  |    |    | √  |    |    |     |    |    |    |    | √  | √  | √  |    |    | √  |     |    |    |     |    | √  |    |
| C43              | √  |    | √  |    | √  |    |    |    | √  | √  |     |    |    |    | √  |    |    | √  |    |    | √  |     |    |    |     | √  |    |    |
| C44              |    | √  |    | √  | √  |    |    | √  |    |    | √   |    |    |    | √  |    |    | √  |    |    | √  |     |    |    |     |    |    | √  |
| C45              | √  |    |    |    | √  |    |    | √  |    |    | √   |    |    | √  |    |    | √  | √  |    |    | √  |     |    |    |     | √  |    |    |
| C46              |    |    |    | √  | √  |    |    | √  |    |    | √   |    |    |    | √  |    |    | √  |    |    | √  |     |    |    |     |    | √  |    |
| C47              |    |    | √  |    | √  |    |    |    | √  |    |     |    |    | √  |    |    |    | √  |    |    | √  |     |    |    |     |    |    | √  |
| C48              |    | √  |    |    | √  |    |    | √  |    |    | √   |    |    |    |    |    |    | √  |    |    | √  |     |    |    |     |    |    | √  |
| C49              |    |    | √  |    | √  |    |    | √  |    |    | √   |    |    |    | √  |    |    | √  |    |    | √  |     |    |    |     |    |    | √  |
| C50              | √  | √  | √  | √  | √  |    |    | √  |    |    |     | √  |    | √  |    |    |    | √  |    |    | √  |     |    |    |     | √  |    |    |
| <b>Hits (N)</b>  | 36 | 16 | 11 | 9  | 46 | 1  | 3  | 29 | 18 | 4  | 32  | 4  | 20 | 11 | 22 | 7  | 10 | 20 | 30 | 8  | 47 | 2   | 29 | 10 | 11  | 31 | 15 | 4  |

### Abbreviations:

ad (Administrative); at (Adapted); CCS (Cloud computing service); ce (Cost efficiency); cl (Clinical); co (Community); DM (Deployment model); el (Elasticity); ex (External); fm (Family member); if (Infrastructure); in (Internal); io (Interoperability); ip (Independent); ms (Medical staff); ni (No involvement); nr (Not real-time); pa (Patient); pb (Public); PDI (Patient data involvement); pf (Platform); pr (Private); re (Research); rt (Real-time); sc (Scalability); SDD (Service delivery device); se (Security); SF (Service form); sg (Strategic); sh (Shareability); sp (Specialized); ST (Supported task); sw (Software); T (Timeliness); TCA (Targeted cloud advantage); U (User); ub (Ubiquity)

### Note:

- a. For the descriptions of the cloud computing services (labelled with C#) cf. Multimedia Appendix 1
